# Supplementary material
Source: PubMed Central journal article supplement (PMC10277888)
Supplement: mmc1.pdf [file mmc1.pdf]

**YMTHE, Volume 31**

**Supplemental Information**

**ROCK inhibition enhanced hepatocyte liver  
engraftment by retaining membrane CD59  
and attenuating complement activation**

**Haixin Ma, Chao Wang, Shulong Liang, Xinlu Yu, Yuan Yuan, Zhuanman Lv, Jiqianzhu  
Zhang, Caixia Jin, Jiangbo Zhu, Chao Wang, Pingxin Sun, and Wenlin Li**

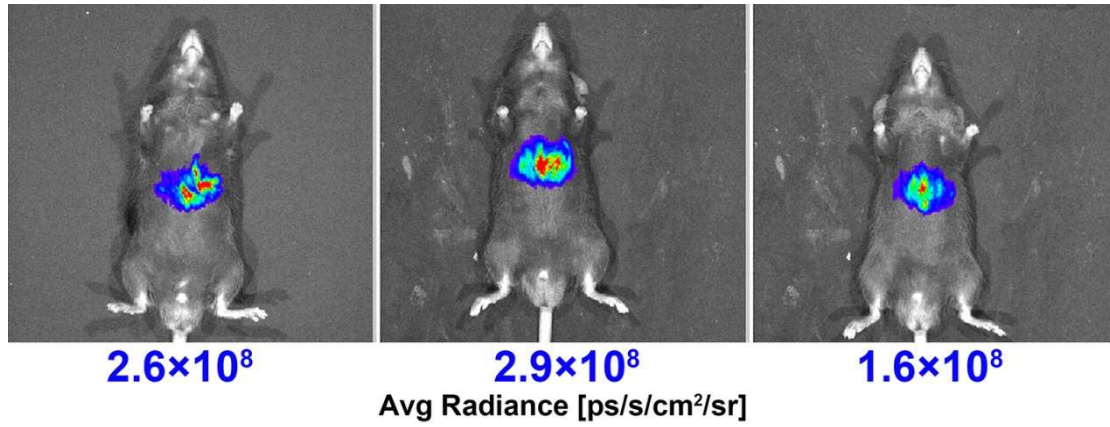

Figure S1. Representative bioluminescence images of mice transduced with replication-incompetent AAV2/8-CAG-EGFP-T2A-luciferase.

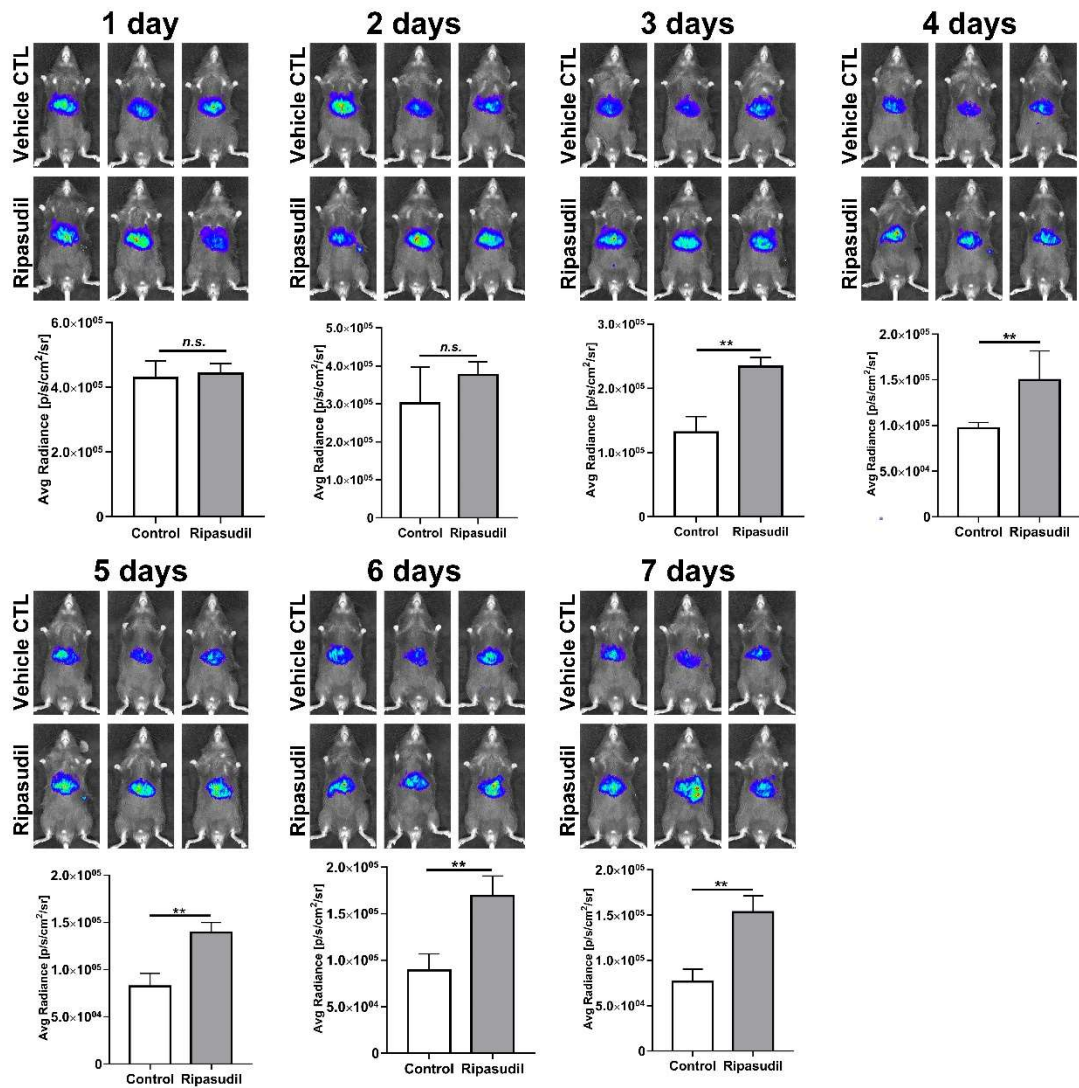

Figure S2. The daily time course of flux values of transplanted hepatocytes with ripasudil treatment for 7 days. Data are shown as the means ± SEMs (n=3). n.s, no significance. \*\*

P<0.01.

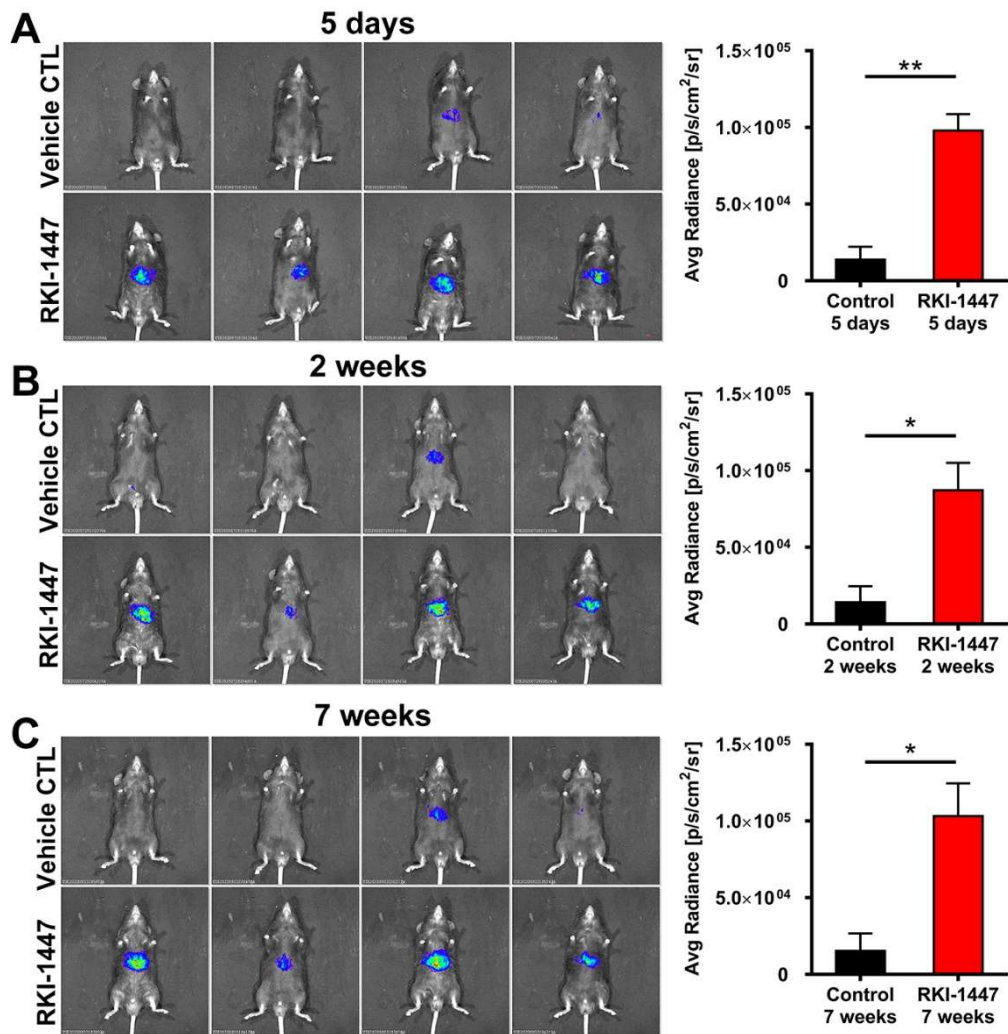

Figure S3. RKI-1447, another ROCK inhibitor with a different chemical scaffold from that of ripasudil, enhances hepatocyte liver engraftment. RKI-1447 (ROCK inhibitor, 80 mg/kg) was administered once intraperitoneally soon after cell transplantation. The mice were analyzed at 5 days, 2 weeks, and 7 weeks after transplantation. Data are shown as the means  $\pm$  SEMs (n=4). \*p < 0.05. \*\* P<0.01.

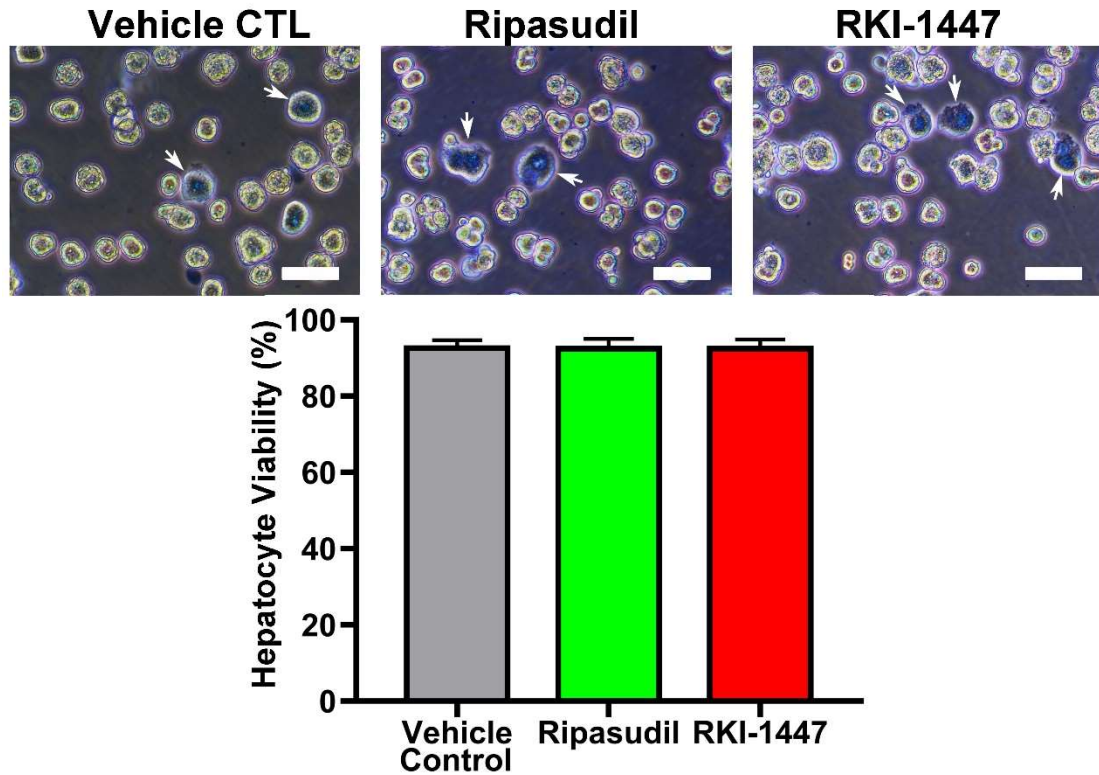

Figure S4. The viability of hepatocytes isolated with perfusion and digestion buffer supplemented with 4  $\mu\text{M}$  ripasudil or RKI-1447. Arrow indicated the cells stained with trypan blue. The scale bars represent 50  $\mu\text{M}$ . Data are expressed as the means  $\pm$  SEMs of four independent hepatocyte isolation experiments.

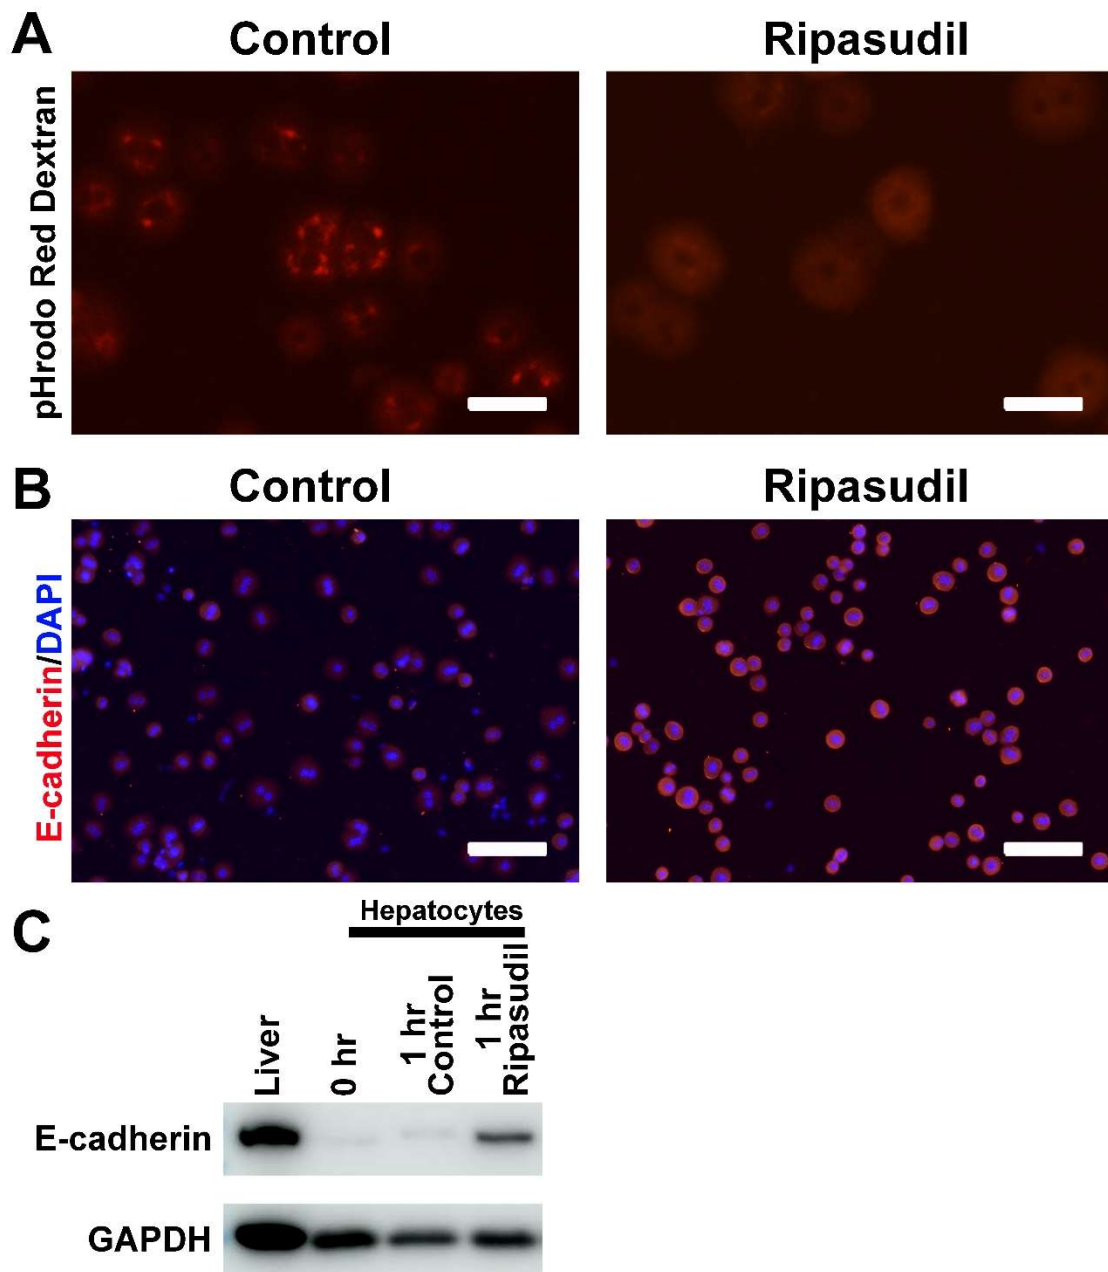

Figure S5. Ripasudil inhibited hepatocyte endocytosis and retained cell membrane E-cadherin. (A) Endocytosis of isolated hepatocytes was demonstrated by pHrodo Red dextran staining. (B) The expression of E-cadherin in isolated hepatocytes was analyzed by immunostaining after treatment with ripasudil or vehicle control. (C) The expression of E-cadherin in the liver and isolated hepatocytes was analyzed by western blotting. The

scale bars represent 50  $\mu\text{M}$  in Panel A and 100  $\mu\text{M}$  in Panel B.

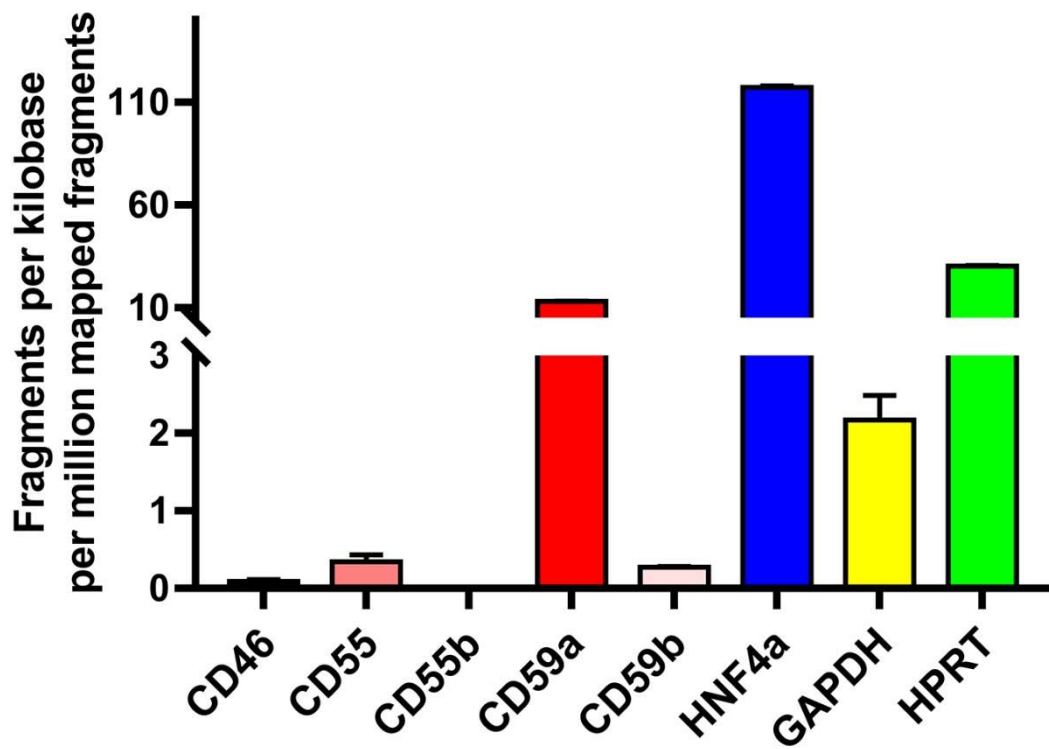

Figure S6. The RNA-seq data (GSE138158) showed that freshly isolated hepatocytes expressed the complement inhibitor CD59a. GSE138158 contains 2 biological repeats of RNA-seq data for freshly isolated hepatocytes.

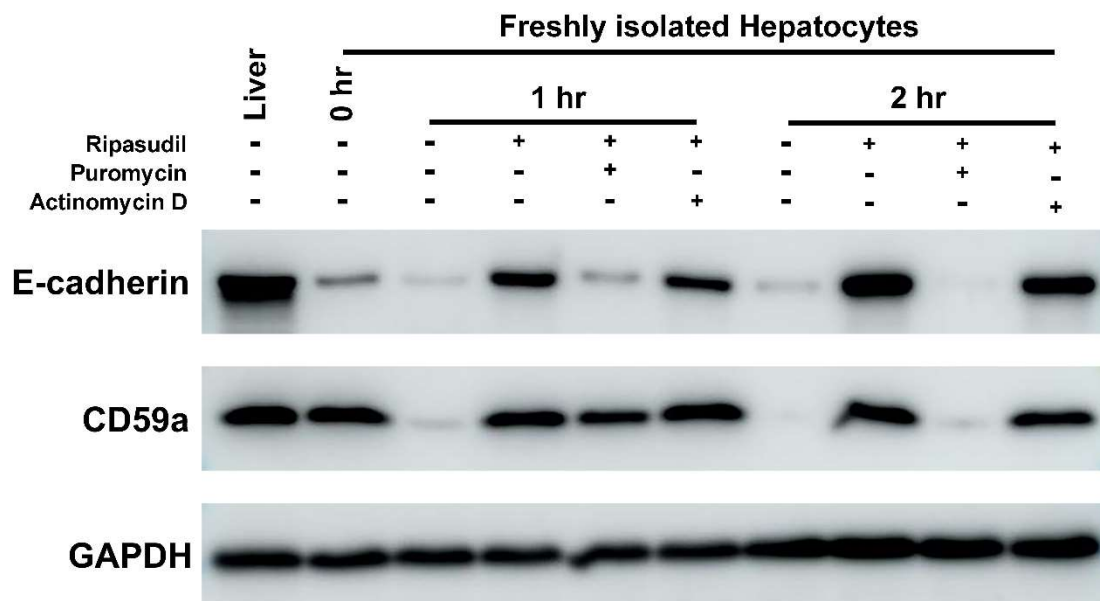

Figure S7. Ripasudil maintains hepatocyte membrane protein homeostasis dependent on protein neosynthesis. The expression of E-cadherin and CD59a in isolated hepatocytes was analyzed by western blotting after treatment with ripasudil, puromycin and actinomycin D.



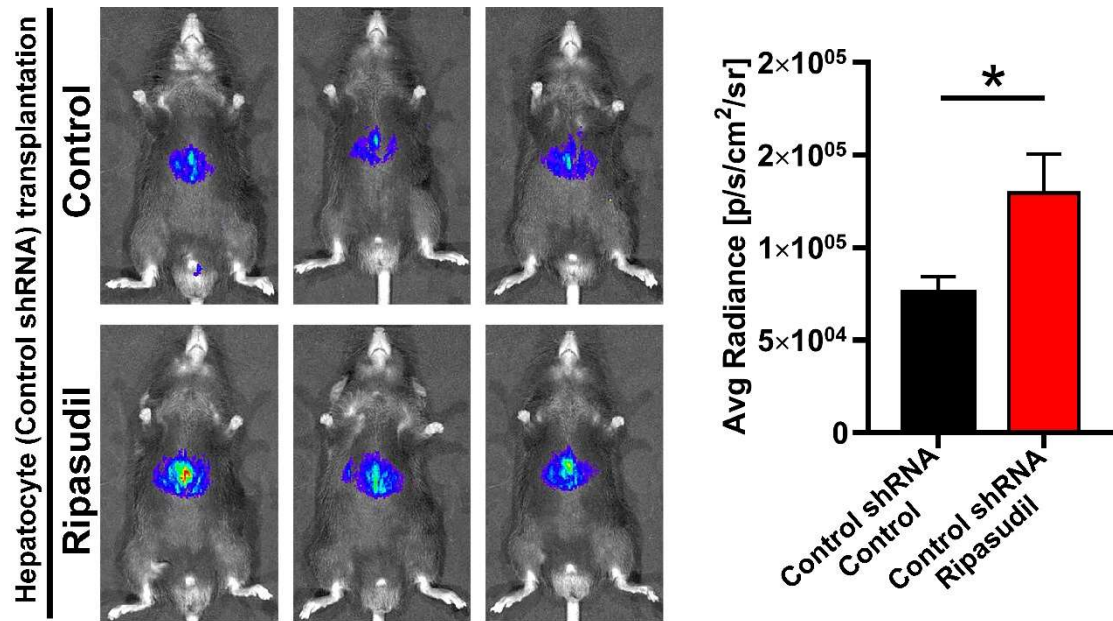

Figure S8. The liver engraftment of hepatocytes expressing control shRNA was analyzed by bioluminescence imaging 3 days after cell transplantation. Data are shown as the means  $\pm$  SEMs of three independent experiments. \* $p < 0.05$ .

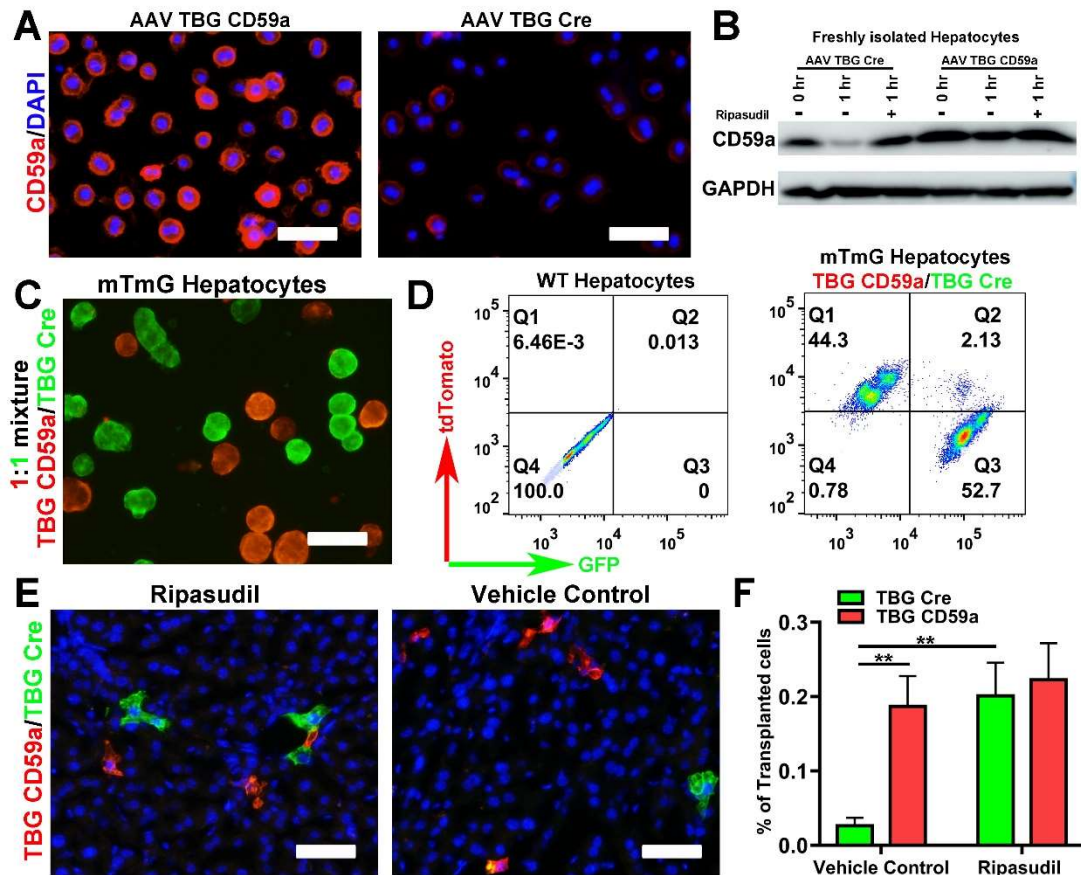

Figure S9. Overexpression of CD59a enhanced hepatocyte liver engraftment. (A) The expression of CD59a in isolated hepatocytes transduced with pAAV-TBG-Cd59a-WPRE or pAAV-TBG-Cre-WPRE was analyzed by immunostaining. (B) CD59a expression by hepatocytes transduced with pAAV-TBG-Cd59a-WPRE or pAAV-TBG-Cre-WPRE was analyzed by western blot. (C and D) Fluorescence images and flow cytometry analysis of 1:1 pooled mTmG hepatocytes transduced with pAAV-TBG-Cd59a-WPRE (red hepatocytes) and pAAV-TBG-Cre-WPRE (green hepatocytes). (E) Fluorescence images of liver sections transplanted with pooled mTmG hepatocytes transduced with pAAV-TBG-Cd59a-WPRE (red hepatocytes) and pAAV-TBG-Cre-WPRE (green hepatocytes). The mice were analyzed at 7 days after transplantation. (F) Quantitative analysis of Panel E. The scale bars represent 50  $\mu$ M. Data are shown as the means  $\pm$  SEMs of three

independent experiments. \*\*p < 0.01.

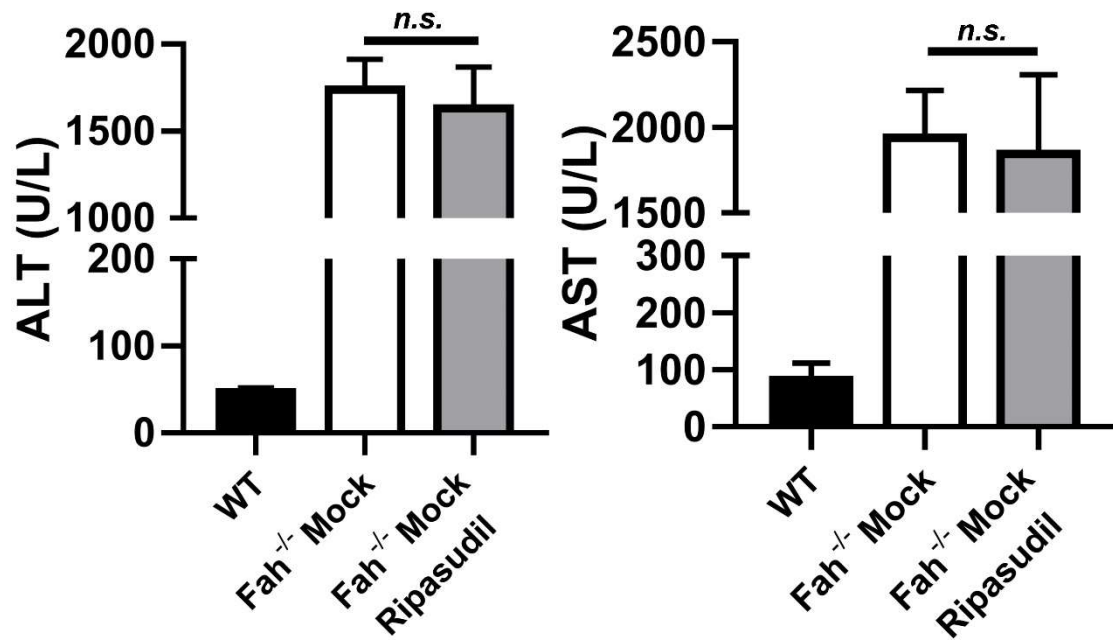

Figure S10. Ripasudil treatment has no impact on liver function in *Fah*<sup>-/-</sup> mice. Serum analysis of alanine aminotransferase (ALT) and aspartate aminotransferase (AST) in *Fah*<sup>-/-</sup> mice at 4 weeks after mock transplantation under treatment with ripasudil or vehicle control.

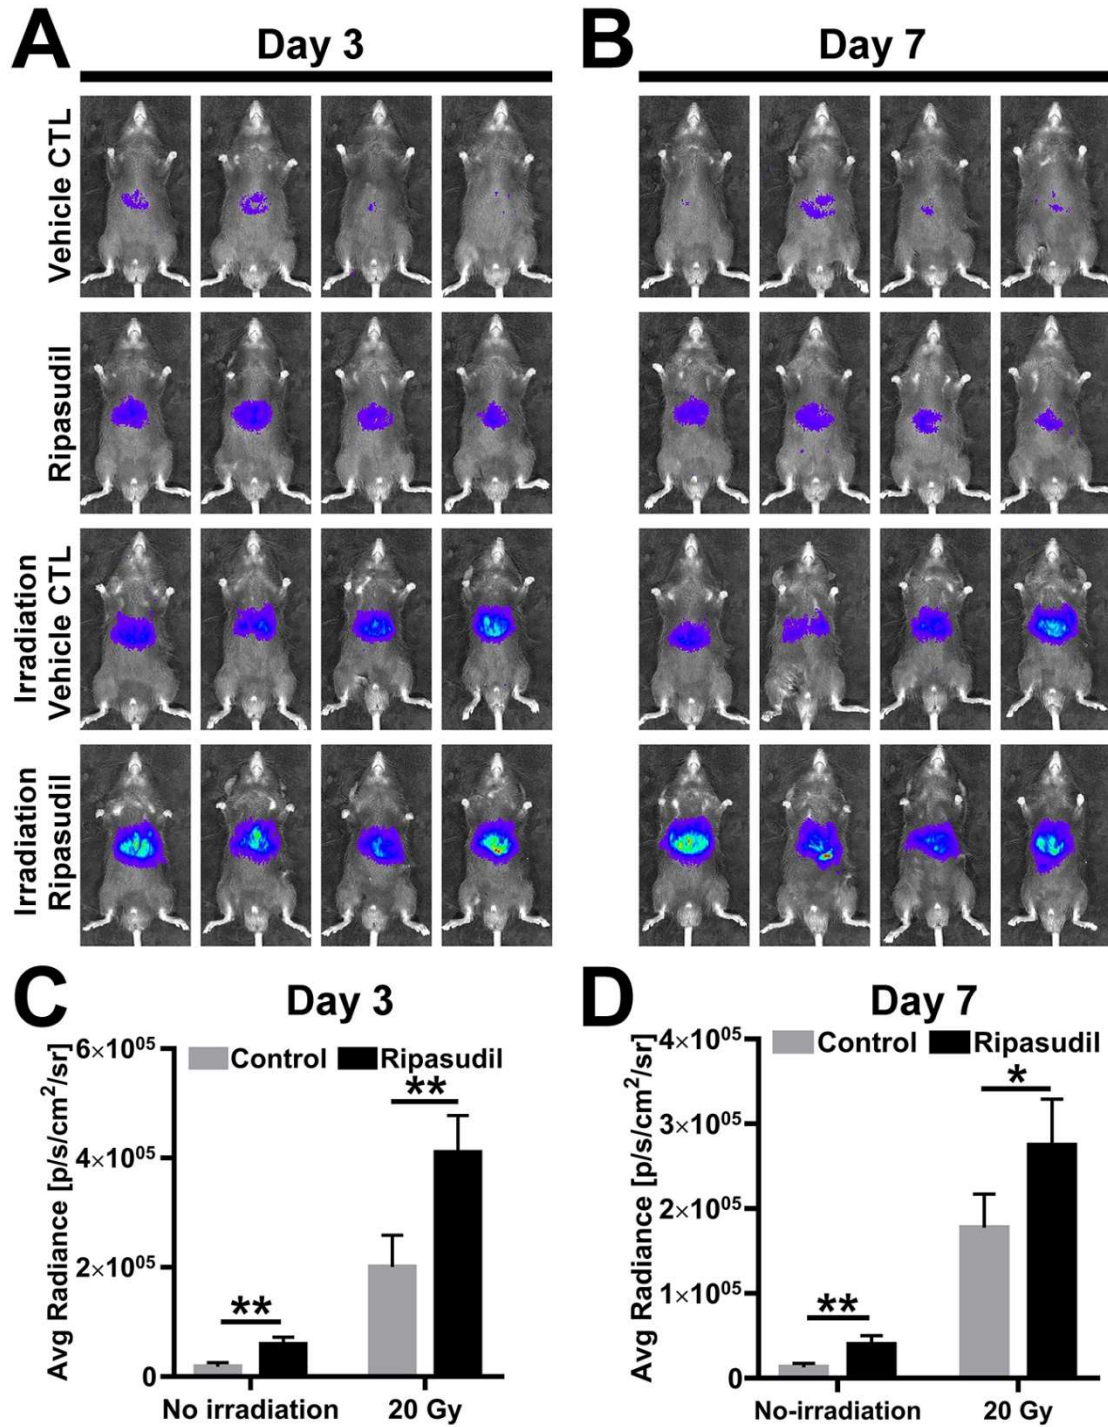

Figure S11. The engraftment of hepatocytes was analyzed by bioluminescence imaging in mice preconditioned with hepatic irradiation and treated with ripasudil. The mice were analyzed at 3 days and 7 days after transplantation. Data are shown as the means  $\pm$

SEMs (n=4). \*p < 0.05. \*\* P<0.01.

Table S1. shRNA sequences.

| shRNA               | Hairpin sequence (5'-3')                                                 |
|---------------------|--------------------------------------------------------------------------|
| <i>CD59a</i> shRNA1 | CACCG <u>CGGTGGTTTCTTCATGCAATACTCGAGTATTGC</u><br>ATGAAGAAACCACCGTTTTTTT |
| <i>CD59a</i> shRNA2 | CACCGTTGTCATGGTGAGATCATTATCTCGAGATAATGA<br>TCTCACCATGACAATTTTTT          |
| <i>CD59a</i> shRNA3 | CACCGCCAGGATTCCTGTCTCTATTTCAAGAGAATAGAG<br>ACAGGAATCCTGGTTTTTTT          |
| Scramble shRNA      | CACCGTTCTCCGAACGTGTCACGTTTCAAGAGAACGTG<br>ACACGTTCCGAGAATTTTTT           |

The target sequences are underlined.

Table S2. Antibodies used in immunocytochemistry, immunohistochemistry and western blot.

| Antibodies                                       | Source                           | Application                                  | Dilution  |
|--------------------------------------------------|----------------------------------|----------------------------------------------|-----------|
| Anti-E-Cadherin, rat monoclonal antibody         | Santa Cruz, sc-59778             | immunocytochemistry                          | 200       |
| Anti-DPP4, goat polyclonal antibody              | R&D, AF954                       | immunohistochemistry                         | 0.5 µg/ml |
| Anti-F4/80, rat monoclonal antibody              | Santa Cruz, sc-52664             | Immunocytochemistry/<br>immunohistochemistry | 200       |
| Anti-CD59a, rabbit monoclonal antibody           | Sino Biological, 50724-R108      | immunocytochemistry                          | 200       |
| Anti-C5b-9, mouse monoclonal antibody            | Santa Cruz, sc-66190             | Immunocytochemistry/<br>immunohistochemistry | 200       |
| Anti-E-Cadherin, rabbit monoclonal antibody      | Cell Signaling Technology, 3195S | western blot                                 | 1000      |
| Anti-CD59, rat monoclonal antibody               | Santa Cruz, sc-59095             | western blot                                 | 500       |
| Anti-GAPDH, mouse monoclonal antibody            | Proteintech, 60004-1-Ig          | western blot                                 | 20000     |
| Anti-β-Actin, HRP-conjugated monoclonal antibody | Proteintech, HRP-60008           | western blot                                 | 2000      |

Table S3. PCR primers used in qRT-PCR experiments.

| Genes        | Forward (5'-3')        | Reverse (5'-3')       |
|--------------|------------------------|-----------------------|
| <i>Gapdh</i> | TGGCAAAGTGGAGATTGTTGCC | AAGATGGTGATGGGCTTCCCG |
| <i>CD59a</i> | TCAATCTGGCTGGGGATGTG   | TGAGGCTAACAGCTGTGGAA  |
